# Supplementary material
Source: HighWire-hosted journal article supplement (https://bmjopen.bmj.com/content/8/4/e020161)
Supplement: inline-supplementary-material-2 [file inline-supplementary-material-2.pdf]

## **Additional File 2. Studies Excluded at Full-Text Assessment**

104 not RCT/NRCT/CBA (including those without contemporaneous comparator group) [1-104]

5 not published in English [105-109]

1 did not include adults [110]

6 participants were not homeless, or homeless participants were not considered separately [111-116]

11 intervention not delivered by a healthcare professional [117-127]

55 did not consider physical long-term conditions [128-182]

2 did not report relevant outcomes [183, 184]

## **Not RCT/NRCT/CBA with contemporaneous control group**

1. Gilpatrick, E.E., *On any avenue*. Journal of psychiatric nursing and mental health services, 1979. **17**(8): p. 27-30.
2. Stern, R. and B. Stilwell, *Treadmill on trial. The healthcare needs and problems of single homeless people*. The Health service journal, 1989. **99**(5167): p. 1102-1103.
3. Nordentoft, M. and B. Jessen-Petersen, *Homelessness, mental disease and intervention programs in the USA*. Ugeskrift for Laeger, 1992. **154**(10): p. 650-651.
4. Brickner, P.W., et al., *Providing health services for the homeless: A stitch in time*. Bulletin of the New York Academy of Medicine: Journal of Urban Health, 1993. **70**(2): p. 146-170.
5. Bailey, S.B., *Improving the quality of healthcare delivery to homeless tuberculosis patients: a new approach*. Journal for healthcare quality : official publication of the National Association for Healthcare Quality, 1993. **15**(2): p. 20-23.
6. Rothenberg, K.H. and E.C. Lovoy, *Something old, something new: the challenge of tuberculosis control in the age of AIDS*. Buffalo Law Review, 1994. **42**(3): p. 715-60.
7. Nyamathi, A., et al. *Evaluation of 2 AIDS education programs for impoverished latina women*. AIDS education and prevention, 1994. **6**, 296-309.
8. Min, K.K., *The white plague returns: law and the new tuberculosis*. Washington Law Review, 1994. **69**: p. 1121-42.
9. Boyd-Franklin, N. and M.G. Boland, *A multisystems approach to service delivery for HIV/AIDS families*, in *Children, families, and HIV/AIDS: Psychosocial and therapeutic issues.*, N. Boyd-Franklin, et al., Editors. 1995, Guilford Press: New York, NY, US. p. 199-215.
10. Stoner, M.R., *Interventions and policies to serve homeless people infected by HIV and AIDS*. Journal of Health & Social Policy, 1995. **7**(1): p. 53-68.
11. Valvassori, P., *Controlling the rise in tuberculosis among the homeless*. NP News, 1995. **3**(2): p. 3, 6.
12. Breakey, W.R., *Clinical work with homeless people in the USA*, in *Homelessness and mental health.*, D. Bhugra and D. Bhugra, Editors. 1996, Cambridge University Press: New York, NY, US. p. 110-132.
13. Diez, E., et al., *Evaluation of a social health intervention among homeless tuberculosis patients*. Tubercle and Lung Disease, 1996. **77**(5): p. 420-424.

14. Caminero, J.A., et al., *Evaluation of a directly observed six months fully intermittent treatment regimen for tuberculosis in patients suspected of poor compliance*. Thorax, 1996. **51**(11): p. 1130-3.
15. Stein, J.A. and L. Gelberg, *Comparability and representativeness of clinical homeless, community homeless, and domiciled clinic samples: Physical and mental health, substance use, and health services utilization*. Health Psychology, 1997. **16**(2): p. 155-162.
16. Plescia, M., et al., *A Multidisciplinary Health Care Outreach Team to the Homeless: The 10-year Experience of the Montefiore Care for the Homeless Team*. Family and Community Health, 1997. **20**(2): p. 58-69.
17. Mason, J., *Care and control*. Nursing times, 1997. **93**(22): p. 25-26.
18. Tenner, A.D., et al., *Seattle YouthCare's prevention, intervention, and education program: A model of care for HIV-positive, homeless, and at-risk youth*. Journal of Adolescent Health, 1998. **23**(2): p. 96-106.
19. Nuttbrock, L., et al. *Intensive case management for homeless substance users on a mobile medical clinic*. Proceedings of the 61st Annual Scientific Meeting of the College on Problems of Drug Dependence; 1999 June; Acapulco, Mexico, 1999. 180.
20. Moss, A. *Adherence to TB and HIV drug regimens among marginalized people*. 152nd Annual Meeting of the American Psychiatric Association; 1999 May 15-20; Washington DC, USA, 1999.
21. Rayner, D., *Reducing the spread of tuberculosis in the homeless population*. British journal of nursing (Mark Allen Publishing), 2000. **9**(13): p. 871-875.
22. Brewer, T.F., et al., *Strategies to decrease tuberculosis in us homeless populations: a computer simulation model*. JAMA, 2001. **286**(7): p. 834-42.
23. Macrorie, R., A. Cordell, and N. Hamlet, *Tuberculosis in primary care*. British Journal of General Practice, 2002. **52**(481): p. 674-675.
24. McDonald, P., *From streets to sidewalks: Developments in primary care services for Injecting Drug Users*. Australian Journal of Primary Health, 2002. **8**(1): p. 65-69.
25. Noddings, N., *Caring, social policy, and homelessness*. Theoretical Medicine & Bioethics, 2002. **23**(6): p. 441-54.
26. Collins, E., *Infection control. A service to address the sexual health needs of the homeless population*. Nursing Times, 2003. **99**(37): p. 53-54.
27. Hackman, A. *Assertive community treatment with homeless individuals*. 156th Annual Meeting of the American Psychiatric Association, May 17-22, San Francisco CA, 2003. No. 78B.
28. Wilde, M.H., et al., *Development of a Student Nurses' Clinic for Homeless Men*. Public Health Nursing, 2004. **21**(4): p. 354-360.
29. Masson, C., et al. *Predictors of medical service utilization among individuals with co-occurring HIV infection and substance abuse disorders*. AIDS care, 2004. **16**, 744-55 DOI: 10.1080/09540120412331269585.
30. Karabanow, J. and P. Clement, *Interventions With Street Youth: A Commentary on the Practice-Based Research Literature*. Brief Treatment and Crisis Intervention, 2004. **4**(1): p. 93-108.
31. Mitty, J.A. and T.P. Flanigan, *Community-based interventions for marginalized populations*. Clinical Infectious Diseases, 2004. **38**(SUPPL. 5): p. S373-S375.
32. Davey, T.L., *A multiple-family group intervention for homeless families: The weekend retreat*. Health and Social Work, 2004. **29**(4): p. 326-329.
33. Hatton, D.C. and L. Kaiser, *Methodological and ethical issues emerging from pilot testing an intervention with women in a transitional shelter*. Western Journal of Nursing Research, 2004. **26**(1): p. 129-36.
34. Hwang, S.W., et al., *Interventions to improve the health of the homeless: A systematic review*. American Journal of Preventive Medicine, 2005. **29**(4): p. 311.e1-311.e75.

35. Colvin, R.A., *Seeding community partnerships in providing medical care that lowers cost of care*. Journal of Healthcare Management, 2005. **50**(5): p. 343-348.
36. Gish, R.G., et al., *Management of hepatitis C virus in special populations: Patient and treatment considerations*. Clinical Gastroenterology and Hepatology, 2005. **3**(4): p. 311-318.
37. Driver, C.R., et al., *Factors associated with tuberculosis treatment interruption in New York City*. Journal of Public Health Management & Practice, 2005. **11**(4): p. 361-8.
38. Lee, T.C., et al., *Risk factors for cardiovascular disease in homeless adults*. Circulation, 2005. **111**(20): p. 2629-35.
39. Moskowitz, D., et al., *Students in the community: An interprofessional student-run free clinic*. Journal of Interprofessional Care, 2006. **20**(3): p. 254-259.
40. Ferlazzo, H., E. Toughill, and M.A. Christopher, *Early Intervention Services for Persons with HIV/AIDS and Hepatitis C: A Community Health Center Perspective*. Nursing Clinics of North America, 2006. **41**(3): p. 371-382.
41. Wright, N.M.J. and C.N.E. Tompkins, *How can health services effectively meet the health needs of homeless people?* British Journal of General Practice, 2006. **56**(525): p. 286-293.
42. Herzberg, G.L., S.A. Ray, and K. Swenson Miller, *The status of occupational therapy: Addressing the needs of people experiencing homelessness*. Occupational Therapy in Health Care, 2006. **20**(3-4): p. 1-8.
43. Moskowitz, D., et al., *Students in the community: an interprofessional student-run free clinic*. [Erratum appears in J Interprof Care. 2006 Dec;20(6):692]. Journal of Interprofessional Care, 2006. **20**(3): p. 254-9.
44. Miller, T.L., et al., *Using cost and health impacts to prioritize the targeted testing of tuberculosis in the United States*. Annals of Epidemiology, 2006. **16**(4): p. 305-12.
45. Herman, D., et al. *Critical Time Intervention: an empirically supported model for preventing homelessness in high risk groups*. The journal of primary prevention, 2007. **28**, 295-312 DOI: 10.1007/s10935-007-0099-3.
46. Lashley, M., *A Targeted Testing Program for Tuberculosis Control and Prevention Among Baltimore City's Homeless Population*. Public Health Nursing, 2007. **24**(1): p. 34-39.
47. Mills, E.J. and C. Cooper, *Simple, effective interventions are key to improving adherence in marginalized populations*. Clinical Infectious Diseases, 2007. **45**(7): p. 916-917.
48. Stewart, M., L. Reutter, and N. Letourneau, *Support intervention for homeless youths*. Canadian Journal of Nursing Research, 2007. **39**(3): p. 203-207.
49. Hogenmiller, J.R., et al., *Self-efficacy scale for Pap smear screening participation in sheltered women*. Nursing Research, 2007. **56**(6): p. 369-77.
50. Petersen, M.L., et al., *Pillbox organizers are associated with improved adherence to HIV antiretroviral therapy and viral suppression: a marginal structural model analysis*. Clinical Infectious Diseases, 2007. **45**(7): p. 908-15.
51. Kim, M.M., et al., *Healthcare barriers among severely mentally ill homeless adults: evidence from the five-site health and risk study*. Administration & Policy in Mental Health, 2007. **34**(4): p. 363-75.
52. Mitchell, C.G., et al., *Preliminary findings of an intervention integrating modified directly observed therapy and risk reduction counseling*. AIDS Care, 2007. **19**(4): p. 561-4.
53. Jakubowiak, W.M., et al., *Risk factors associated with default among new pulmonary TB patients and social support in six Russian regions*. [Erratum appears in Int J Tuberc Lung Dis. 2007 Mar;11(3):354 Note: Borisov, E S [corrected to Borisov, S E]; Danilova, D I [corrected to Danilova, I D]; Kourbatova, E K [corrected to Kourbatova, E V]]. International Journal of Tuberculosis & Lung Disease, 2007. **11**(1): p. 46-53.
54. Herman, D.B. and J. Manuel, *Populations at special health risk: The homeless*, in *International Encyclopedia of Public Health*. 2008. p. 261-268.

55. Ohkado, A., et al., *Molecular epidemiology of Mycobacterium tuberculosis in an urban area in Japan, 2002-2006*. International Journal of Tuberculosis & Lung Disease, 2008. **12**(5): p. 548-54.
56. Braciszewski, J.M., et al., *Journal of Prevention and Intervention in the Community: Introduction*. Journal of Prevention and Intervention in the Community, 2009. **37**(2): p. 83-85.
57. Deering, K.N., et al., *Piloting a peer-driven intervention model to increase access and adherence to antiretroviral therapy and HIV care among street-entrenched HIV-positive women in Vancouver*. AIDS Patient Care & STDs, 2009. **23**(8): p. 603-609.
58. Kertesz, S.G., et al., *Post-hospital medical respite care and hospital readmission of homeless persons*. Journal of Prevention and Intervention in the Community, 2009. **37**(2): p. 129-142.
59. Wilkinson, M., et al., *Community-based treatment for chronic hepatitis C in drug users: high rates of compliance with therapy despite ongoing drug use*. Alimentary Pharmacology & Therapeutics, 2009. **29**(1): p. 29-37.
60. Wenzel, S.L., et al., *A pilot of a tripartite prevention program for homeless young women in the transition to adulthood*. Womens Health Issues, 2009. **19**(3): p. 193-201.
61. Rodriguez, R.M., et al., *Food, shelter and safety needs motivating homeless persons' visits to an urban emergency department*. Annals of Emergency Medicine, 2009. **53**(5): p. 598-602.
62. Weiser, S.D., et al., *Food insecurity is associated with incomplete HIV RNA suppression among homeless and marginally housed HIV-infected individuals in San Francisco*. Journal of General Internal Medicine, 2009. **24**(1): p. 14-20.
63. O'Toole, T.P., et al., *Applying the chronic care model to homeless veterans of a population approach to primary care on utilization and clinical outcomes*. American Journal of Public Health, 2010. **100**(12): p. 2493-2499.
64. Greenberg, G.A. and R.A. Rosenheck, *An evaluation of an initiative to improve coordination and service delivery of homeless services networks*. The Journal of Behavioral Health Services & Research, 2010. **37**(2): p. 184-196.
65. Teruya, C., et al., *Health and health care disparities among homeless women*. Women & Health, 2010. **50**(8): p. 719-736.
66. O'Toole, T.P., et al., *Applying the chronic care model to homeless veterans: Effect of a population approach to primary care on utilization and clinical outcomes*. American Journal of Public Health, 2010. **100**(12): p. 2493-2499.
67. Dryden, E., et al., *Phoenix Rising: Use of a participatory approach to evaluate a federally funded HIV, Hepatitis and substance abuse prevention program*. Evaluation and Program Planning, 2010. **33**(4): p. 386-393.
68. Tsai, A.C., et al., *A marginal structural model to estimate the causal effect of antidepressant medication treatment on viral suppression among homeless and marginally housed persons with HIV*. Archives of General Psychiatry, 2010. **67**(12): p. 1282-90.
69. Bangsberg, D.R., et al., *A single tablet regimen is associated with higher adherence and viral suppression than multiple tablet regimens in HIV+ homeless and marginally housed people*. AIDS, 2010. **24**(18): p. 2835-40.
70. O'Toole, T.P., et al., *Building care systems to improve access for high-risk and vulnerable veteran populations*. Journal of General Internal Medicine, 2011. **26**(Suppl 2): p. 683-688.
71. Godlee, F., *Don't forget tuberculosis*. BMJ (Online), 2011. **343**(7818).
72. Zimmermann, L., D. Buchanan, and L. Rohr, *Housing and casemanagement decrease hospitalizations among frequent users of hospital services: A pilot study*. Journal of General Internal Medicine, 2011. **26**: p. S147.
73. Jones, M., et al., *Engaging 'hard to reach' patients with diabetes by proactive case management and partnership working: A pilot study in an integrated inner-city intermediate care diabetes service*. Diabetic Medicine, 2011. **28**: p. 140-141.

74. Raven, M.C., *What we don't know may hurt us: interventions for frequent emergency department users*. Annals of Emergency Medicine, 2011. **58**(1): p. 53-5.
75. Patterson, M., J. Somers, and A. Moniruzzaman, *Sealing the cracks: Preliminary findings from an inter-ministry initiative to address chronic homelessness in British Columbia*. Journal of Interprofessional Care, 2012. **26**(5): p. 426-428.
76. Compton, M., et al., *Supported housing as a component of a treatment as prevention (TASP) pilot initiative*. Canadian Journal of Infectious Diseases and Medical Microbiology, 2012. **23**: p. 92A.
77. Kangovi, S., J.A. Long, and E. Emanuel, *Community health workers combat readmission*. Archives of Internal Medicine, 2012. **172**(22): p. 1756-1757.
78. Davachi, S. and I. Ferrari, *Homelessness and diabetes: Reducing disparities in diabetes care through innovations and partnerships*. Canadian Journal of Diabetes, 2012. **36**(2): p. 75-82.
79. McGowan, P.T., *Self-Management Education and Support in Chronic Disease Management*. Primary Care - Clinics in Office Practice, 2012. **39**(2): p. 307-325.
80. Plumb, J., et al., *Community-Based Partnerships for Improving Chronic Disease Management*. Primary Care - Clinics in Office Practice, 2012. **39**(2): p. 433-447.
81. Willey, R.M., *Managing heart failure: a critical appraisal of the literature*. Journal of Cardiovascular Nursing, 2012. **27**(5): p. 403-417.
82. Wainman- Lefley, J. and T. McMillan, *Survival outcome of homeless people 15 years after a mild head injury*. Brain Injury, 2012. **26** (4-5): p. 759-760.
83. Mitruka, K., C.A. Winston, and T.R. Navin, *Predictors of failure in timely tuberculosis treatment completion, United States*. International Journal of Tuberculosis & Lung Disease, 2012. **16**(8): p. 1075-82.
84. Kmietowicz, Z., *NICE advises screening for TB in hostels and prisons to reduce UK cases*. BMJ, 2012. **344**: p. e2309.
85. Slesnick, N. and G. Erdem *Intervention for Homeless, Substance Abusing Mothers: Findings from a Non-Randomized Pilot*. Behavioral medicine (Washington, D.C.), 2012. **38**, 36-48 DOI: 10.1080/08964289.2012.657724.
86. Doran, K.M., E.J. Misa, and N.R. Shah, *Housing as health care - New York's boundary-crossing experiment*. New England Journal of Medicine, 2013. **369**(25): p. 2374-2377.
87. Ho, C.J., et al., *A unique model for treating chronic hepatitis c in patients with psychiatric disorders, substance abuse, and/or housing instability*. Journal of Addiction Medicine, 2013. **7**(5): p. 320-324.
88. Tankimovich, M., *Barriers to and Interventions for Improved Tuberculosis Detection and Treatment among Homeless and Immigrant Populations: A Literature Review*. Journal of Community Health Nursing, 2013. **30**(2): p. 83-95.
89. Speirs, V., M. Johnson, and S. Jirojwong, *A systematic review of interventions for homeless women*. Journal of Clinical Nursing, 2013. **22**(7/8): p. 1080-1093.
90. Garden, B., et al., *Food incentives improve adherence to tuberculosis drug treatment among homeless patients in Russia*. Scandinavian Journal of Caring Sciences, 2013. **27**(1): p. 117-22.
91. Hwang, S.W. and T. Burns, *Health interventions for people who are homeless*. The Lancet, 2014. **384**(9953): p. 1541-1547.
92. Wilson, A.B. and J. Squires, *Young children and families experiencing homelessness*. Infants & Young Children, 2014. **27**(3): p. 259-271.
93. Medcalf, P. and G.K. Russell, *Homeless healthcare: Raising the standards*. Clinical Medicine, Journal of the Royal College of Physicians of London, 2014. **14**(4): p. 349-353.
94. Goldwater, J.C., et al., *The use of health information technology for mental health and chronic disease treatment among the homeless*, in *Homelessness: Prevalence, Impact of Social Factors and Mental Health Challenges*. 2014. p. 83-106.
95. Asgary, R., et al., *Colorectal cancer screening among the homeless population of New York City shelter-based clinics*. American Journal of Public Health, 2014. **104**(7): p. 1307-1313.

96. Aldridge, R., et al. *Impact of peer educators on uptake of mobile x-ray tuberculosis screening at homeless hostels: a cluster randomised controlled trial*. Thorax, 2014. **69**, A44 [s80] DOI: 10.1136/thoraxjnl-2014-206260.86.
97. Wilkins, C., *Connecting permanent supportive housing to health care delivery and payment systems: Opportunities and challenges*. American Journal of Psychiatric Rehabilitation, 2015. **18**(1): p. 65-86.
98. Thorley, H., et al., *Interventions for preventing or treating malnutrition in problem drinkers who are homeless or vulnerably housed: Protocol for a systematic review*. Systematic Reviews, 2015. **4**(1): p. 1-7.
99. Klein, J.W. and S. Reddy, *Care of the Homeless Patient*. Medical Clinics of North America, 2015. **99**(5): p. 1017-1038.
100. Lutge, E.E., et al., *Incentives and enablers to improve adherence in tuberculosis*. Cochrane Database of Systematic Reviews, 2015. **9**: p. CD007952.
101. Nguyen, M.A., et al., *Perceived cessation treatment effectiveness, medication preferences, and barriers to quitting among light and moderate/heavy homeless smokers*. Drug & Alcohol Dependence, 2015. **153**: p. 341-5.
102. Nelson, G., E. Macnaughton, and P. Goering *What qualitative research can contribute to a randomized controlled trial of a complex community intervention*. Contemporary clinical trials, 2015. **45**, 377-84 DOI: 10.1016/j.cct.2015.10.007.
103. Grazioli, V., et al. *Safer-Drinking Strategies Used by Chronically Homeless Individuals with Alcohol Dependence*. Journal of Substance Abuse Treatment, 2015. **54**, 63-8 DOI: 10.1016/j.jsat.2015.01.010.
104. Gulland, A., *Keeping homeless patients off the streets*. BMJ (Online), 2016. **352** (no pagination)(i318).
105. de la Blanchardiere, A., et al., *[Medical, psychological and social study in 350 patients in a precarious situation, undertaken by a permanently maintained health care facility in 2002]*. Revue de Medecine Interne, 2004. **25**(4): p. 264-70.
106. Sánchez-Arcilla, I., et al. *[Treatment of latent tuberculosis among homeless population. Comparison between two therapeutic approaches]*. Medicina clínica, 2004. **122**, 57-9.
107. Tomashevskii, A.F., *Tuberculosis-controlling measures among the populations of increased study complexity and epidemic significance. [Russian]*. Problemy tuberkuleza i boleznei legkikh, 2005(11): p. 36-40.
108. Bihan, H., *Educating the homeless and migrant diabetics*. Medecine des Maladies Metaboliques, 2007. **1**(3): p. 76-79.
109. Matsumoto, K., et al., *[Medication support and treatment outcome in homeless patients with tuberculosis]. [Japanese]*. Kekkaku : [Tuberculosis], 2013. **88**(9): p. 659-665.
110. Puccio, J.A., et al., *The use of cell phone reminder calls for assisting HIV-infected adolescents and young adults to adhere to highly active antiretroviral therapy: a pilot study*. AIDS Patient Care & Stds, 2006. **20**(6): p. 438-44.
111. Davidson, M.B., V.J. Karlan, and T.L. Hair, *Effect of a pharmacist-managed diabetes care program in a free medical clinic*. American Journal of Medical Quality, 2000. **15**(4): p. 137-42.
112. Altice, F.L., et al., *Developing a directly administered antiretroviral therapy intervention for HIV-infected drug users: Implications for program replication*. Clinical Infectious Diseases, 2004. **38**(SUPPL. 5): p. S376-S387.
113. Herman, D.S., et al., *Feasibility of a Telephone Intervention for HIV Patients and Their Informal Caregivers*. Journal of Clinical Psychology in Medical Settings, 2006. **13**(1): p. 81-90.
114. Groessl, E.J., et al., *The hepatitis C self-management programme: A randomized controlled trial*. Journal of Viral Hepatitis, 2011. **18**(5): p. 358-368.
115. Groessl, E.J., et al., *The Hepatitis C Self-Management Program: Sustainability of Primary Outcomes at 1 Year*. Health Education & Behavior, 2013. **40**(6): p. 730-740.

116. Ho, S.B., et al., *Integrated Care Increases Treatment and Improves Outcomes of Patients With Chronic Hepatitis C Virus Infection and Psychiatric Illness or Substance Abuse*. Clinical Gastroenterology and Hepatology, 2015. **13**(11): p. 2005-2014.e3.
117. Conrad, K., et al. *Case managed residential care for homeless addicted veterans. Results of a true experiment*. Medical care, 1998. **36**, 40-53.
118. Rosenblum, A., et al., *Medical outreach to homeless substance users in New York City: Preliminary results*. Substance Use & Misuse, 2002. **37**(8-10): p. 1269-1273.
119. Buchanan, D., et al., *The health impact of supportive housing for HIV-positive homeless patients: a randomized controlled trial*. American journal of public health, 2009. **99 Suppl 3**: p. S675-680.
120. Sadowski, L., et al. *Effect of a housing and case management program on emergency department visits and hospitalizations among chronically ill homeless adults: a randomized trial*. Jama, 2009. **301**, 1771-8 DOI: 10.1001/jama.2009.561.
121. Buchanan, D., et al. *The health impact of supportive housing for HIV-positive homeless patients: a randomized controlled trial*. American journal of public health, 2009. **99 Suppl 3**, S675-80 DOI: 10.2105/AJPH.2008.137810.
122. Rotheram-Borus, M., et al. *Reducing risky sexual behavior and substance use among currently and formerly homeless adults living with HIV*. American journal of public health, 2009. **99**, 1100-7 DOI: 10.2105/AJPH.2007.121186.
123. Wolitski, R.J., et al., *Randomized trial of the effects of housing assistance on the health and risk behaviors of homeless and unstably housed people living with HIV*. AIDS and Behavior, 2010. **14**(3): p. 493-503.
124. Song, J., et al., *Effect of an End-of-Life Planning Intervention on the completion of advance directives in homeless persons: a randomized trial.[Summary for patients in Ann Intern Med. 2010 Jul 20;153(2):1-38; PMID: 20643975]*. Annals of Internal Medicine, 2010. **153**(2): p. 76-84.
125. Henry, S.R., M.B. Goetz, and S.M. Asch, *The effect of automated telephone appointment reminders on hiv primary care no-shows by veterans*. JANAC: Journal of the Association of Nurses in AIDS Care, 2012. **23**(5): p. 409-418.
126. Basu, A., et al. *Comparative cost analysis of housing and case management program for chronically ill homeless adults compared to usual care*. Health services research, 2012. **47**, 523-43 DOI: 10.1111/j.1475-6773.2011.01350.x.
127. O'Connell, M., W. Kaspro, and R. Rosenheck *Differential impact of supported housing on selected subgroups of homeless veterans with substance abuse histories*. Psychiatric services (Washington, D.C.), 2012. **63**, 1195-205.
128. Stevens, A., et al., *The public health management of tuberculosis among the single homeless: is mass miniature x ray screening effective?* Journal of Epidemiology & Community Health, 1992. **46**(2): p. 141-3.
129. Tollett, J. *Effects of a nursing intervention with homeless veterans*. THE UNIVERSITY OF TENNESSEE 1992 PHD (198 p), 1992.
130. Geringer, W.M. and M. Hinton, *Three models to promote syphilis screening and treatment in a high risk population*. Journal of Community Health, 1993. **18**(3): p. 137-151.
131. Braucht, G.N., et al., *Effective services for homeless substance abusers*. Journal of Addictive Diseases, 1995. **14**(4): p. 87-109.
132. Mowbray, C.T. and D. Bybee, *Services provided by a homeless intervention: Policy and planning implications*. Journal of Sociology and Social Welfare, 1996. **23**(4): p. 129-146.
133. Susser, E., et al., *Preventing recurrent homelessness among mentally ill men: A 'critical time' intervention after discharge from a shelter*. American Journal of Public Health, 1997. **87**(2): p. 256-262.
134. Toro, P.A., et al., *Evaluating an intervention for homeless persons: Results of a field experiment*. Journal of Consulting and Clinical Psychology, 1997. **65**(3): p. 476-484.

135. Nyamathi, A., et al. *Effectiveness of a specialized vs. traditional AIDS education program attended by homeless and drug-addicted women alone or with supportive persons*. AIDS education and prevention, 1998. **10**, 433-46.
136. Susser, E., et al. *Human immunodeficiency virus sexual risk reduction in homeless men with mental illness*. Archives of general psychiatry, 1998. **55**, 266-72.
137. Nyamathi, A., et al., *Evaluating the impact of peer, nurse case-managed, and standard HIV risk-reduction programs on psychosocial and health-promoting behavioral outcomes among homeless women*. Research in Nursing & Health, 2001. **24**(5): p. 410-422.
138. Nyamathi, A., et al. *Evaluating the impact of peer, nurse case-managed, and standard HIV risk-reduction programs on psychosocial and health-promoting behavioral outcomes among homeless women*. Research in nursing & health, 2001. **24**, 410-22.
139. Kashner, T.M., et al., *Impact of work therapy on health status among homeless, substance-dependent veterans: a randomized controlled trial*. Archives of General Psychiatry, 2002. **59**(10): p. 938-44.
140. Rosenheck, R.A., et al., *Service systems integration and outcomes for mentally ill homeless persons in the ACCESS program*. Psychiatric Services, 2002. **53**(8): p. 958-966.
141. Davidson, E., et al., *Can a health advocate for homeless families reduce workload for the primary healthcare team? A controlled trial*. Health and Social Care in the Community, 2004. **12**(1): p. 63-74.
142. Constantino, R., Y. Kim, and P.A. Crane, *Effects of a social support intervention on health outcomes in residents of a domestic violence shelter: a pilot study*. Issues in Mental Health Nursing, 2005. **26**(6): p. 575-90.
143. Okuyemi, K.S., et al., *Smoking cessation in homeless populations: a pilot clinical trial*. Nicotine & Tobacco Research, 2006. **8**(5): p. 689-99.
144. Baer, J.S., et al., *Brief motivational intervention with homeless adolescents: Evaluating effects on substance use and service utilization*. Psychology of Addictive Behaviors, 2007. **21**(4): p. 582-586.
145. Helfrich, C.A. and L.F. Fogg, *Outcomes of a life skills intervention for homeless adults with mental illness*. The Journal of Primary Prevention, 2007. **28**(3-4): p. 313-326.
146. Slesnick, N., et al., *Treatment outcome for street-living, homeless youth*. Addictive Behaviors, 2007. **32**(6): p. 1237-1251.
147. Cheng, A.L., et al., *Impact of supported housing on clinical outcomes: Analysis of a randomized trial using multiple imputation technique*. Journal of Nervous and Mental Disease, 2007. **195**(1): p. 83-88.
148. Cheng, A., et al. *Impact of supported housing on clinical outcomes: analysis of a randomized trial using multiple imputation technique*. The Journal of nervous and mental disease, 2007. **195**, 83-8 DOI: 10.1097/01.nmd.0000252313.49043.f2.
149. Savage, C.L., et al., *Improving health status of homeless patients at a nurse-managed clinic in the Midwest USA*. Health and Social Care in the Community, 2008. **16**(5): p. 469-475.
150. Shumway, M., et al., *Cost-effectiveness of clinical case management for ED frequent users: results of a randomized trial*. American Journal of Emergency Medicine, 2008. **26**(2): p. 155-64.
151. Kisely, S.R., et al., *Health impacts of supportive housing for homeless youth: A pilot study*. Public Health, 2008. **122**(10): p. 1089-1092.
152. Gilmer, T.P., W.G. Manning, and S.L. Ettner, *Cost analysis of San Diego county's REACH program for homeless persons*. Psychiatric Services, 2009. **60**(4): p. 445-450.
153. Kisely, S. and P. Chisholm, *Shared mental health care for a marginalized community in inner-city Canada*. Australasian Psychiatry, 2009. **17**(2): p. 130-133.
154. Springer, S.A., S. Chen, and F. Altice, *Depression and symptomatic response among HIV-infected drug users enrolled in a randomized controlled trial of directly administered*



- antiretroviral therapy*. *AIDS Care - Psychological and Socio-Medical Aspects of AIDS/HIV*, 2009. **21**(8): p. 976-983.
155. Nyamathi, A.M., et al., *Feasibility of completing an accelerated vaccine series for homeless adults*. *Journal of Viral Hepatitis*, 2009. **16**(9): p. 666-73.
  156. Nyamathi, A., et al. *Effects of a nurse-managed program on hepatitis A and B vaccine completion among homeless adults*. *Nursing research*, 2009. **58**, 13-22 DOI: 10.1097/NNR.0b013e3181902b93.
  157. Gilmer, T.P., et al., *Effect of full-service partnerships on homelessness, use and costs of mental health services, and quality of life among adults with serious mental illness*. *Archives of General Psychiatry*, 2010. **67**(6): p. 645-652.
  158. Reback, C.J., et al., *Contingency management among homeless, out-of-treatment men who have sex with men*. *Journal of Substance Abuse Treatment*, 2010. **39**(3): p. 255-263.
  159. Rota-Bartelink, A. and B. Lipmann, *Alcohol related brain injury - An appropriate model of residential care. The wicking project*. *Brain Injury*, 2010. **24** (3): p. 127.
  160. Song, J., et al., *Summaries for patients. End-of-Life Planning intervention and the Completion of Advance Directives in homeless persons.[Original report in Ann Intern Med. 2010 Jul 20;153(2):76-84; PMID: 20643989]*. *Annals of Internal Medicine*, 2010. **153**(2): p. 1-38.
  161. Sahajian, F., et al., *A randomized trial of viral hepatitis prevention among underprivileged people in the Lyon area of France*. *Journal of Public Health*, 2011. **33**(2): p. 182-192.
  162. Goldade, K., et al. *Designing a smoking cessation intervention for the unique needs of homeless persons: a community-based randomized clinical trial*. *Clinical trials* (London, England), 2011. **8**, 744-54 DOI: 10.1177/1740774511423947.
  163. Thompson, R. *Brief alcohol and HIV intervention for homeless young adults who exited foster care*. *Alcoholism, clinical and experimental research*, 2011. **35**, 293a.
  164. Gordon, R.J., et al., *Health and social adjustment of homeless older adults with a mental illness*. *Psychiatric Services*, 2012. **63**(6): p. 561-568.
  165. Burda, C., et al., *Medication adherence among homeless patients: a pilot study of cell phone effectiveness*. *Journal of the American Academy of Nurse Practitioners*, 2012. **24**(11): p. 675-81.
  166. Smelson, D.A., et al., *A wraparound treatment engagement intervention for homeless veterans with co-occurring disorders*. *Psychological Services*, 2013. **10**(2): p. 161-167.
  167. McCormack, R.P., et al., *Resource-limited, collaborative pilot intervention for chronically homeless, alcohol-dependent frequent emergency department users*. *American journal of public health*, 2013. **103** Suppl 2: p. S221-224.
  168. Pantin, M., N.R. Leonard, and H. Hagan, *Sexual HIV/HSV-2 risk among drug users in New York City: an HIV testing and counseling intervention*. *Substance Use & Misuse*, 2013. **48**(6): p. 438-45.
  169. Okuyemi, K., et al. *Motivational interviewing to enhance nicotine patch treatment for smoking cessation among homeless smokers: a randomized controlled trial*. *Addiction* (Abingdon, England), 2013. **108**, 1136-44 DOI: 10.1111/add.12140.
  170. Patterson, M.L., A. Moniruzzaman, and J.M. Somers, *Community Participation and Belonging Among Formerly Homeless Adults with Mental Illness After 12 months of Housing First in Vancouver, British Columbia: A Randomized Controlled Trial*. *Community Mental Health Journal*, 2014. **50**(5): p. 604-611.
  171. Tomita, A. and D.B. Herman, *The role of a critical time intervention on the experience of continuity of care among persons with severe mental illness after hospital discharge*. *Journal of Nervous and Mental Disease*, 2015. **203**(1): p. 65-70.
  172. Stergiopoulos, V., et al., *Effectiveness of housing first with intensive case management in an ethnically diverse sample of homeless adults with mental illness: A randomized controlled trial*. *PLoS ONE*, 2015. **10**(7).

173. Aldridge, R.W., et al., *Effectiveness of peer educators on the uptake of mobile X-ray tuberculosis screening at homeless hostels: A cluster randomised controlled trial*. *BMJ Open*, 2015. **5**(9).
174. Jones, E.S. and J. Meek, *Impact of nursing intervention on improving HIV, hepatitis knowledge and mental health among homeless young adults (Nyamathi et al. 2013)*. *HIV Nursing*, 2015. **15**(3): p. 92-92.
175. Cheung, A., et al., *Emergency department use and hospitalizations among homeless adults with substance dependence and mental disorders*. *Addiction Science & Clinical Practice*, 2015. **10**: p. 17.
176. Bell, J.F., et al., *A randomized controlled trial of intensive care management for disabled Medicaid beneficiaries with high health care costs*. *Health Services Research*, 2015. **50**(3): p. 663-89.
177. Richards, C., et al. *Retention of Homeless Smokers in the Power to Quit Study*. *Nicotine & tobacco research : official journal of the Society for Research on Nicotine and Tobacco*, 2015. **17**, 1104-11 DOI: 10.1093/ntr/ntu210.
178. Veldhuizen, S., et al. *Patterns and predictors of attrition in a trial of a housing intervention for homeless people with mental illness*. *Social psychiatry and psychiatric epidemiology*, 2015. **50**, 195-202 DOI: 10.1007/s00127-014-0909-x.
179. Woodhall-Melnik, J., et al. *The Impact of a 24 Month Housing First Intervention on Participants' Body Mass Index and Waist Circumference: Results from the At Home / Chez Soi Toronto Site Randomized Controlled Trial*. *PloS one*, 2015. **10**, e0137069 DOI: 10.1371/journal.pone.0137069.
180. Thompson, T., M.W. Kreuter, and S. Boyum, *Promoting health by addressing basic needs: Effect of problem resolution on contacting health referrals*. *Health Education & Behavior*, 2016. **43**(2): p. 201-207.
181. *Interventions to improve access to primary care for people who are homeless: A systematic review*. Ontario Health Technology Assessment Series, 2016. **16**(9): p. 1-50.
182. Anonymous, *Interventions to improve access to primary care for people who are homeless: A systematic review*. Ontario Health Technology Assessment Series, 2016. **16**(9): p. 1-50.
183. Kidder, D.P., et al., *Access to housing as a structural intervention for homeless and unstably housed people living with HIV: rationale, methods, and implementation of the housing and health study*. *AIDS & Behavior*, 2007. **11**(6 Suppl): p. 149-61.
184. Song, J., et al., *Engaging homeless persons in end of life preparations*. *Journal of General Internal Medicine*, 2008. **23**(12): p. 2031-2045.
