# Supplementary material
Source: HighWire-hosted journal article supplement (https://bmjopen.bmj.com/content/8/4/e020161)
Supplement: inline-supplementary-material-4 [file inline-supplementary-material-4.pdf]

[illegible]

|            |       |  |  |  |  |            |  |                                                        |  |  |                                                 |                                             |  |  |  |  |  |            |
|------------|-------|--|--|--|--|------------|--|--------------------------------------------------------|--|--|-------------------------------------------------|---------------------------------------------|--|--|--|--|--|------------|
| 2004       |       |  |  |  |  | all groups |  |                                                        |  |  |                                                 |                                             |  |  |  |  |  | study arms |
| Tyler 2014 | Group |  |  |  |  |            |  | Health promotion and transmission prevention education |  |  | Case management on top of vaccination programme | Onward referral for medical or social needs |  |  |  |  |  |            |
